# Supplementary figures and images for: Sleep Quality and Quantity in Caregivers of Children with Type 1 Diabetes Using Closed-Loop Insulin Delivery or a Sensor-Augmented Pump
Source: Hindawi journal article supplement (doi:10.1155/2023/7937007), 2023-06-13

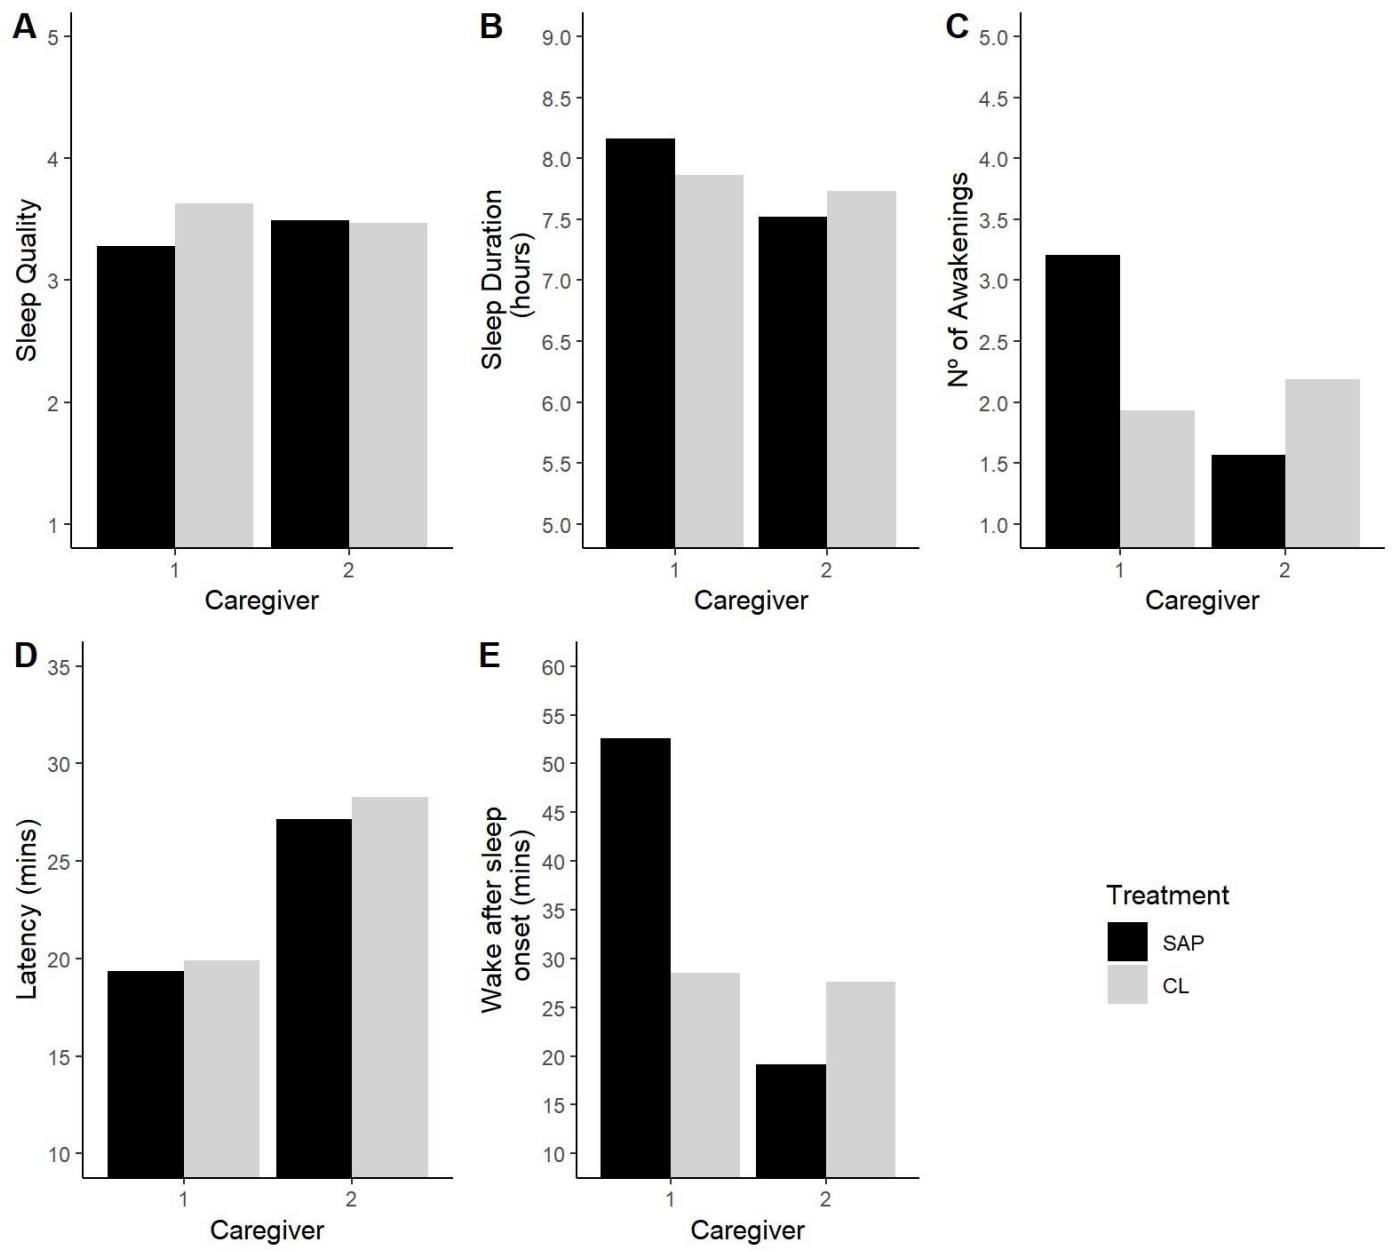

Supplement: f1 [file 7937007.f1.zip]

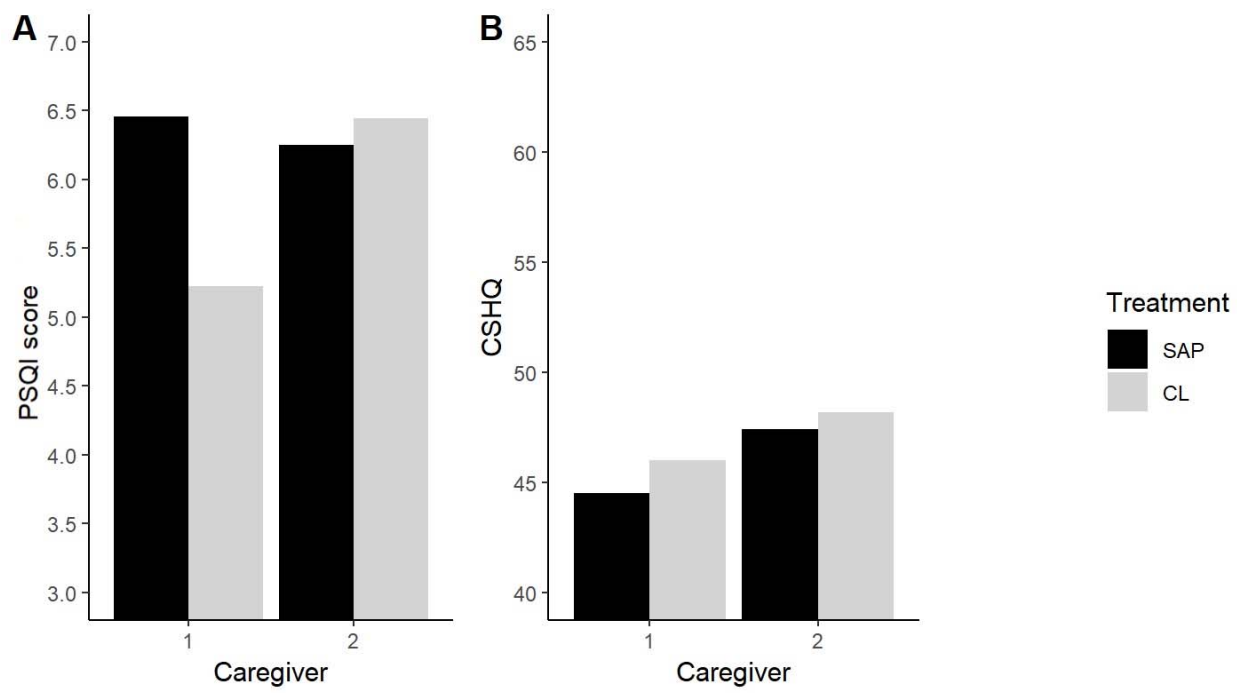

Supplement: f1 [file 7937007.f1.zip]

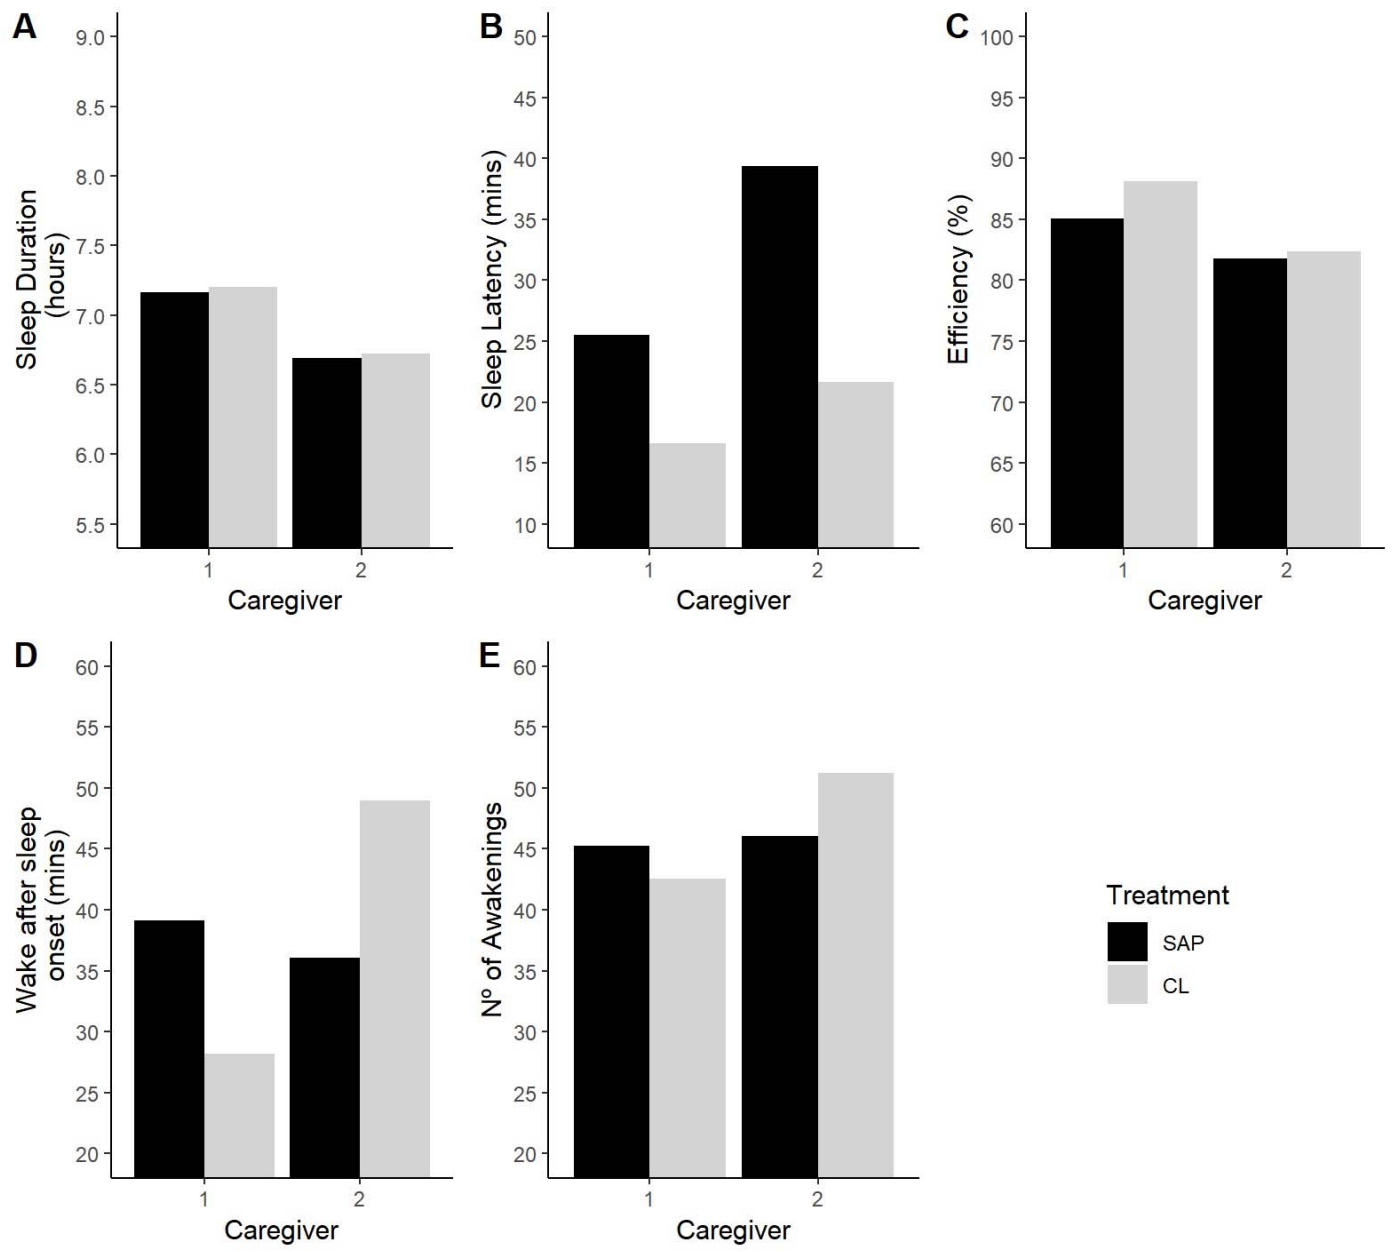

Supplement: f1 [file 7937007.f1.zip]
